# Supplementary material
Source: PubMed Central journal article supplement (PMC4996968)

Figure S1

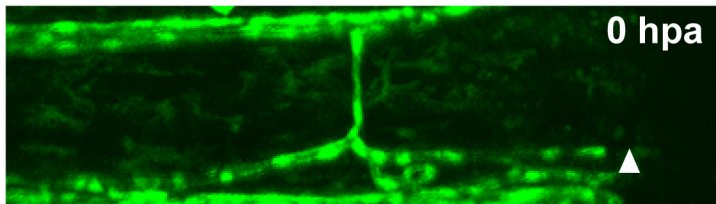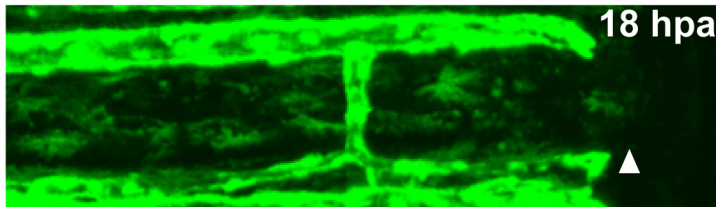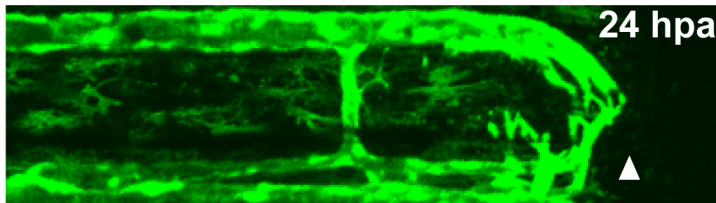

# Figure S2

**A**

*Tg(fli1:EGFP)*

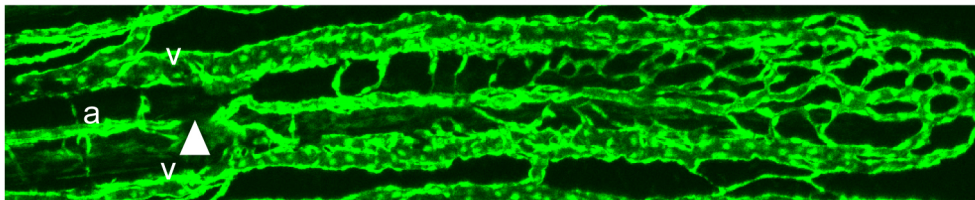

**B**

*Tg(fli1:EGFP)*

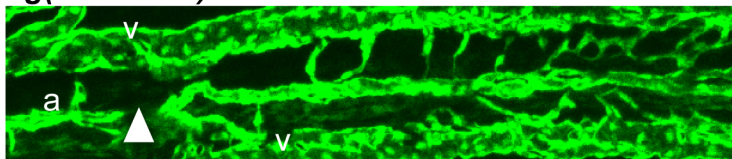

*Tg(flt4:YFP)*

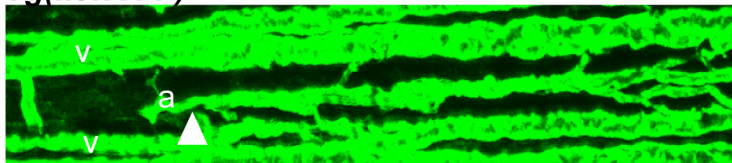

*Tg(kdrl:EGFP); Tg(gata1:dsRed)*

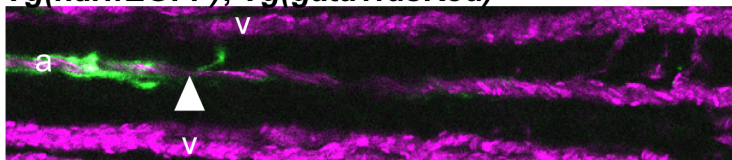

Figure S3

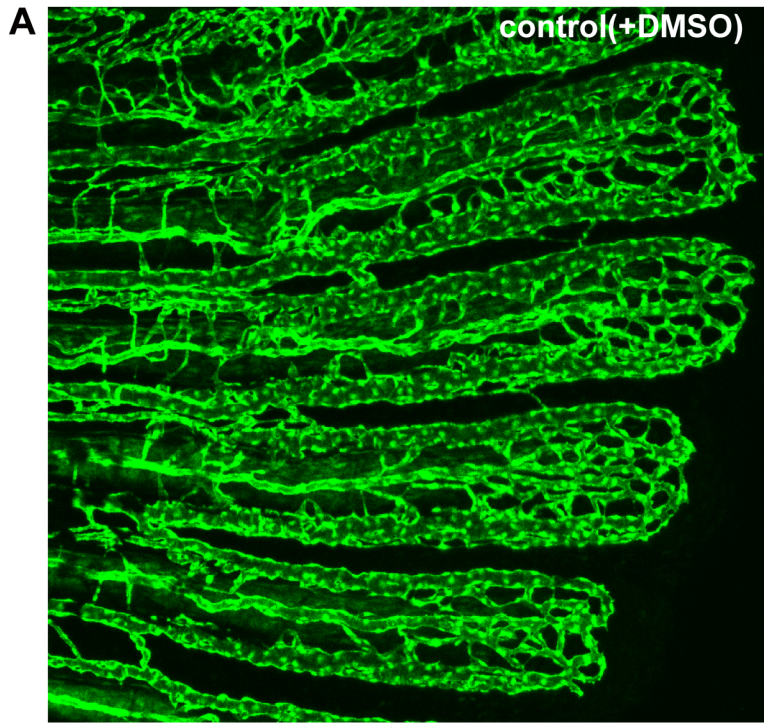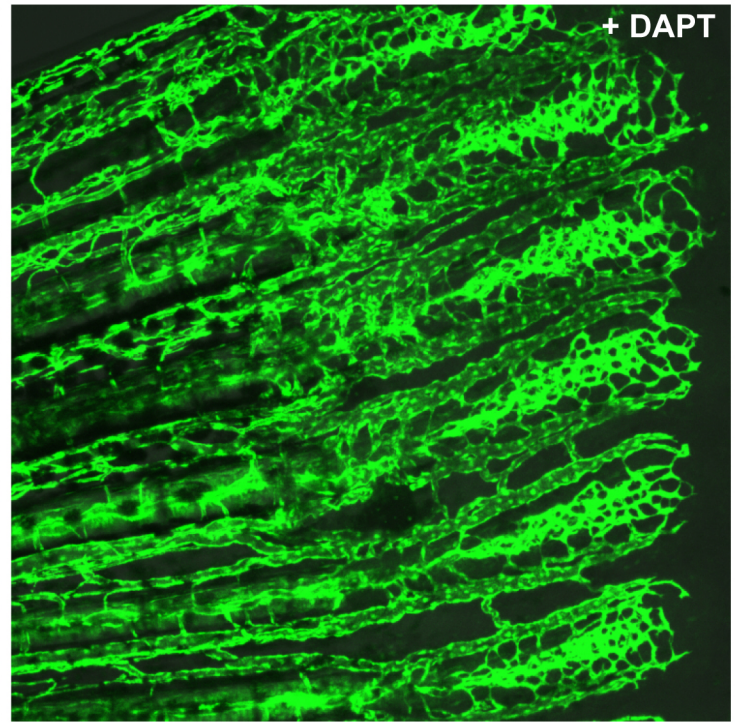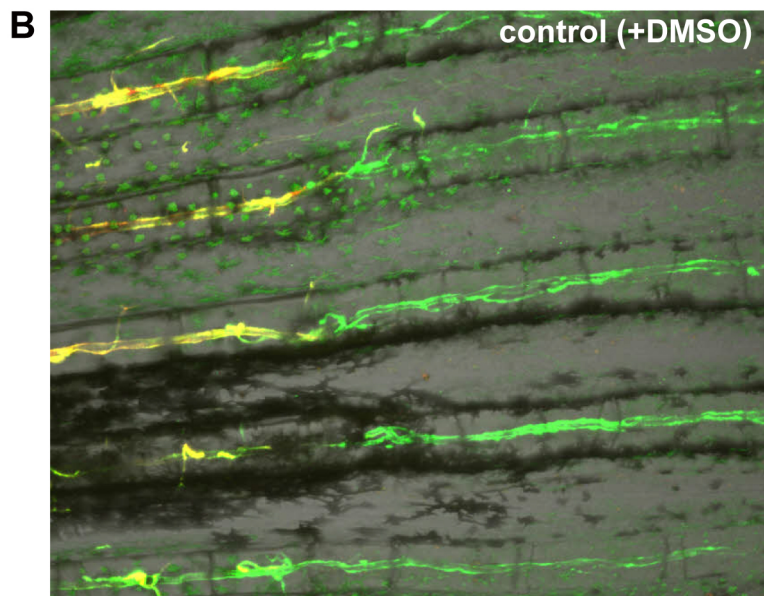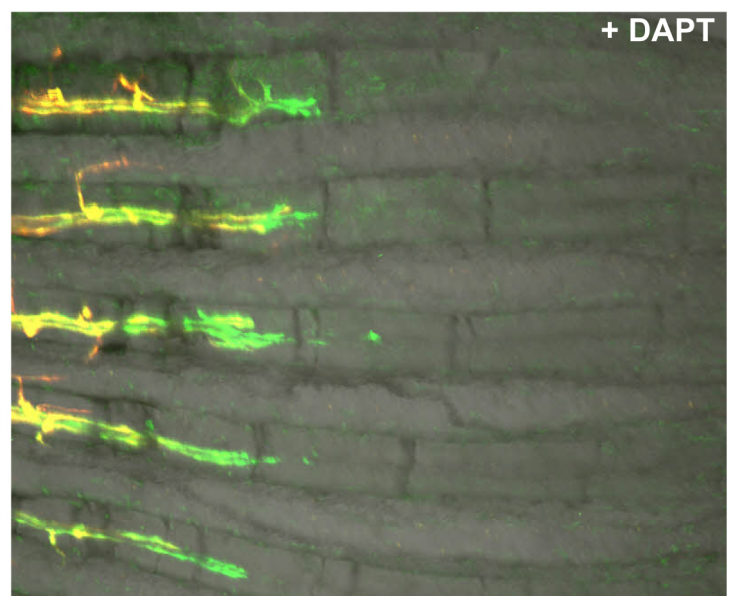

Supplement: NIHMS667732-supplement-Supp_FigureS1-S3.pdf [file NIHMS667732-supplement-Supp_FigureS1-S3.pdf]
